# Supplementary material for: bc-GenExMiner 4.5: new mining module computes breast cancer differential gene expression analyses
Source: Oxford University Press journal article supplement (doi:10.1093/database/baab007), 2021-01-01
Supplement: baab007_supp.zip [file baab007_supp.zip]

# Supplementary Table S1. Breast cancer microarray (A) and RNAseq (B) transcriptomic data included in bc-GenExMiner v4.5 database

## A

| Ver | Reference                 | No patients | Study code     | Platform origin | Platform code          | DNA chip                        | No. unique genes (2019) | Processing              |
|-----|---------------------------|-------------|----------------|-----------------|------------------------|---------------------------------|-------------------------|-------------------------|
| 1.0 | Van de Vijver et al. 2002 | 295         | Rosetta2002    | Agilent         | No code                | 25k oligo custom                | 14853                   | log2 ratio              |
| 1.0 | Sotiriou et al. 2003      | 99          | PNAS1732912100 | NCI             | No code                | 8k cDNA custom                  | 4345                    | log2 ratio              |
| 1.0 | Ma et al. 2004            | 59          | GSE1378        | Arcturus        | GPL1223                | 22k oligo custom                | 14839                   | log2 ratio              |
| 1.0 | Minn et al. 2005          | 82          | GSE2603        | Affymetrix®     | GPL96                  | HG-U133A                        | 12262                   | MAS5 and log2           |
| 1.0 | Pawitan et al. 2005       | 159         | GSE1456        | Affymetrix®     | GPL96 - GPL97          | HG-U133A + B                    | 18430                   | MAS5 and log2           |
| 1.0 | Wang et al. 2005          | 286         | GSE2034        | Affymetrix®     | GPL96                  | HG-U133A                        | 12262                   | MAS5 and log2           |
| 1.0 | Weigelt et al. 2005       | 50          | GSE2741        | Agilent         | GPL1390                | Human 1A oligo UNC custom       | 13980                   | log2 ratio              |
| 1.0 | Bild et al. 2006          | 158         | GSE3143        | Affymetrix®     | GPL91                  | HG-U95A v2                      | 8767                    | MAS5 and log2           |
| 1.0 | Chin et al. 2006          | 112         | E_TABM_158     | Affymetrix®     | A-AFFY-76              | HG-U133A v2                     | 12262                   | MAS5 and log2           |
| 1.0 | Ivshina et al. 2006       | 249         | GSE4922        | Affymetrix®     | GPL96 - GPL97          | HG-U133A + B                    | 18430                   | MAS5 and log2           |
| 1.0 | Desmedt et al. 2007       | 198         | GSE7390        | Affymetrix®     | GPL96 - GPL97 - GPL570 | HG-U133A                        | 12262                   | MAS5 and log2           |
| 1.0 | Loi et al. 2007           | 267         | GSE6532        | Affymetrix®     | GPL96                  | HG U133A + B + P2               | 20542                   | MAS5 and log2           |
| 1.0 | Minn et al. 2007          | 58          | GSE5327        | Affymetrix®     | GPL96                  | HG-U133A                        | 12262                   | MAS5 and log2           |
| 1.0 | Naderi et al. 2007        | 135         | E_UCON_1       | Agilent         | A-AGIL-14              | Human 1A oligo G4110A           | 14258                   | log2 ratio              |
| 1.0 | Anders et al. 2008        | 75          | GSE7849        | Affymetrix®     | GPL91                  | HG-U95A v2                      | 8767                    | MAS5 and log2           |
| 1.0 | Chanrion et al. 2008      | 151         | GSE9893        | MLRG            | GPL5049                | Human 21k v12.0                 | 15014                   | MAS5 and log2           |
| 1.0 | Loi et al. 2008           | 77          | GSE9195        | Affymetrix®     | GPL570                 | HG-U133P2                       | 20542                   | MAS5 and log2           |
| 1.0 | Calabrò et al. 2009       | 139         | GSE10510       | DKFZ            | GPL6486                | 35k oligo                       | 17807                   | log2 ratio              |
| 1.0 | Jézéquel et al. 2009      | 252         | GSE11264       | UMGC-IRCNA      | GPL4819                | 9k cDNA custom                  | 1808                    | log2 ratio              |
| 1.1 | Schmidt et al. 2008       | 200         | GSE111121      | Affymetrix®     | GPL96                  | HG-U133A                        | 12262                   | MAS5 and log2           |
| 1.1 | Zhang et al. 2009         | 136         | GSE12093       | Affymetrix®     | GPL96                  | HG-U133A                        | 12262                   | MAS5 and log2           |
| 3.1 | Chin et al. 2007          | 171         | GSE8757        | VUMC Microarray | GPL5737                | Human 30K 60-mer oligo array    | 17782                   | log2 ratio              |
| 3.1 | Zhou et al. 2007          | 54          | GSE7378        | Affymetrix®     | GPL96                  | HG-U133A                        | 12262                   | MAS5 and log2           |
| 3.1 | Desmedt et al. 2009       | 55          | GSE16391       | Affymetrix®     | GPL570                 | HG-U133P2                       | 20542                   | MAS5 and log2           |
| 3.1 | Jönsson et al. 2010       | 346         | GSE22133       | SweGene         | GPL5345                | H_v2.1.1 55K                    | 9236                    | log2 ratio              |
| 3.1 | Li et al. 2010            | 115         | GSE19615       | Affymetrix®     | GPL570                 | HG-U133P2                       | 20542                   | MAS5 and log2           |
| 3.1 | Sircoulomb et al. 2010    | 55          | GSE17907       | Affymetrix®     | GPL570                 | HG-U133P2                       | 20542                   | MAS5 and log2           |
| 3.1 | Buffa et al. 2011         | 216         | GSE22219       | Illumina        | GPL6098                | HumanRef-8 v1.0 expr-bc         | 15757                   | log2 ratio              |
| 3.1 | Dedeurwaerder et al. 2011 | 85          | GSE20711       | Affymetrix®     | GPL570                 | HG-U133P2                       | 20542                   | MAS5 and log2           |
| 3.1 | Filipits et al. 2011      | 277         | GSE26971       | Affymetrix®     | GPL96                  | HG-U133A                        | 12262                   | MAS5 and log2           |
| 3.1 | Hatzis et al. 2011        | 309         | GSE25055       | Affymetrix®     | GPL96                  | HG-U133A                        | 12262                   | MAS5 and log2           |
| 3.1 | Kao et al. 2011           | 296         | GSE20685       | Affymetrix®     | GPL570                 | HG-U133P2                       | 20542                   | MAS5 and log2           |
| 3.1 | Sabatier et al. 2011      | 239         | GSE21653       | Affymetrix®     | GPL570                 | HG-U133P2                       | 20542                   | MAS5 and log2           |
| 3.1 | Wang et al. 2011          | 149         | GSE16987       | Illumina        | GPL6104                | HumanRef-8 v2.0 expr-bc         | 17132                   | log2 ratio              |
| 3.1 | Kuo et al. 2012           | 51          | GSE33926       | Agilent         | GPL7264                | Human 1A Microarray (V2) G4110B | 16641                   | log2 ratio              |
| 3.1 | Nagalla et al. 2013       | 41          | GSE45255       | Affymetrix®     | GPL96                  | HG-U133A                        | 12262                   | MAS5 and log2           |
| 4.3 | expO et al. 2005          | 298         | GSE2109        | Affymetrix®     | GPL570                 | HG-U133P2                       | 20542                   | MAS5 and log2           |
| 4.3 | Yau et al. 2007           | 47          | GSE8193        | Affymetrix®     | GPL96                  | HG-U133A                        | 12262                   | MAS5 and log2           |
| 4.3 | Parris et al. 2010        | 94          | GSE20462       | Illumina        | GPL6947                | HumanHT-12 V3.0                 | 19016                   | Quantile norm. and log2 |
| 4.3 | Symmans et al. 2010       | 43          | GSE17705       | Affymetrix®     | GPL96                  | HG-U133A                        | 12262                   | MAS5 and log2           |
| 4.3 | Heikkinen et al. 2011     | 174         | GSE24450       | Illumina        | GPL6947                | HumanHT-12 V3.0                 | 19016                   | Quantile norm. and log2 |
| 4.3 | Sabatier et al. 2011      | 71          | GSE31448       | Affymetrix®     | GPL570                 | HG-U133P2                       | 20542                   | MAS5 and log2           |
| 4.3 | Curtis et al. 2012        | 1980        | METABRIC       | Illumina        | GPL6947                | HumanHT-12 V3.0                 | 18025                   | Quantile norm. and log2 |
| 4.3 | Guedj et al. 2012         | 536         | E_MTAB_365     | Affymetrix®     | GPL570                 | HG-U133P2                       | 20542                   | MAS5 and log2           |
| 4.3 | Servant et al. 2012       | 343         | GSE30682       | Illumina        | GPL6884                | HumanWG-6 v3.0                  | 19016                   | Quantile norm. and log2 |
| 4.3 | Clarke et al. 2013        | 104         | GSE42568       | Affymetrix®     | GPL570                 | HG-U133P2                       | 20542                   | MAS5 and log2           |
| 4.3 | Larsen et al. 2013        | 183         | GSE40115       | Agilent         | GPL15931               | SurePrint G3 Human GE 8x60K     | 20118                   | log2 ratio              |
| 4.3 | Castagnoli et al. 2014    | 53          | GSE55348       | Illumina        | GPL14951               | HumanHT-12 WG-DASL V4.0 R2      | 19459                   | Quantile norm. and log2 |
| 4.3 | Fumagalli et al. 2014     | 56          | GSE43358       | Affymetrix®     | GPL570                 | HG-U133P2                       | 20542                   | MAS5 and log2           |
| 4.3 | Merdad et al. 2014        | 45          | GSE36295       | Affymetrix®     | GPL6244                | Gene 1.0 ST                     | 20251                   | rma-gene-level          |
| 4.3 | Terunuma et al. 2014      | 55          | GSE37751       | Affymetrix®     | GPL6244                | Gene 1.0 ST                     | 20251                   | rma-gene-level          |
| 4.3 | Burstein et al. 2015      | 66          | GSE76274       | Affymetrix®     | GPL570                 | HG-U133P2                       | 20542                   | MAS5 and log2           |
| 4.3 | Michaut et al. 2016       | 104         | GSE68057       | Agilent         | GPL20078               | Agendia32627 DPv1.14 SCFGplus   | 20209                   | Quantile norm. and log2 |
| 4.3 | Biermann et al. 2017      | 53          | GSE97177       | Illumina        | GPL6947                | HumanHT-12 V3.0                 | 19016                   | Quantile norm. and log2 |
| 4.5 | Bos et al. 2009           | 204         | GSE12276       | Affymetrix®     | GPL570                 | HG-U133P2                       | 20542                   | MAS5 and log2           |
| 4.5 | Silver et al. 2010        | 75          | GSE18864       | Affymetrix®     | GPL570                 | HG-U133P2                       | 20542                   | MAS5 and log2           |
| 4.5 | Burstein et al. 2015      | 198         | GSE76124       | Affymetrix®     | GPL570                 | HG-U133P2                       | 20542                   | MAS5 and log2           |
| 4.5 | Jézéquel et al. 2015      | 107         | GSE58812       | Affymetrix®     | GPL570                 | HG-U133P2                       | 20542                   | MAS5 and log2           |
| 4.5 | Jézéquel et al. 2019      | 131         | GSE83937       | Affymetrix®     | GPL570                 | HG-U133P2                       | 20542                   | MAS5 and log2           |

Ver: version number of bc-GenExMiner; No: number of

## B

| Ver | Reference            | No patients | Study code        | Platform origin | Platform code | DNA chip   | No. unique genes (2019) | Processing    | Analysis                               |
|-----|----------------------|-------------|-------------------|-----------------|---------------|------------|-------------------------|---------------|----------------------------------------|
| 4.3 | TCGA et al. 2012     | 1034        | TCGA              | RNAseq          | Illumina      | HiSeq      | 36237                   | FPKM and log2 | All except<br>« Nature of the tissue » |
| 4.3 | Brueffer et al. 2018 | 405         | SCAN-B / GSE81538 | Illumina        | GPL11154      | HiSeq 2000 | 18628                   | FPKM and log2 |                                        |
| 4.3 | Saal et al. 2018     | 3273        | SCAN-B / GSE96058 | Illumina        | GPL11154      | HiSeq 2000 | 23638                   | FPKM and log2 |                                        |
| 4.5 | TCGA et al. 2012     | 1142        | TCGA              | RNAseq          | Illumina      | HiSeq      | 22444                   | TPM and log2  | « Nature of the tissue »               |
| 4.5 | GTEx et al. 2019     | 92          | GTEx              | RNAseq          | Illumina      | HiSeq      | 22444                   | TPM and log2  |                                        |

Ver: version number of bc-GenExMiner; No: number of

**Supplementary Table S2.** Breast cancer clinocopathological characteristics associated with microarray (A) and RNAseq (B) transcriptomic data included in bc-GenExMiner v4.5 database.

**A**

| Ver   | Reference                 | No patients | ER <sup>a</sup>  | PR <sup>a</sup> | HER2 <sup>a</sup> | Nodal status | Histo. type | SBR  | NPI              | AOL | Age diagn. | P53 |      |      | SSPs | SCMs | Event status |      |      |
|-------|---------------------------|-------------|------------------|-----------------|-------------------|--------------|-------------|------|------------------|-----|------------|-----|------|------|------|------|--------------|------|------|
|       |                           |             |                  |                 |                   |              |             |      |                  |     |            | IHC | Seq  | GES  |      |      | DMFS         | OS   | DFS  |
| 1.0   | Van de Vijver et al. 2002 | 295         | 295              | 41              | -                 | 295          | -           | 41   | 40 <sup>c</sup>  | -   | 41         | -   | -    | -    | 295  | 295  | 101          | 79   | 122  |
| 1.0   | Sotiriou et al. 2003      | 99          | 99               | -               | -                 | 99           | 99          | 99   | 99               | 99  | 99         | -   | -    | -    | 90   | 99   | 30           | 45   | 53   |
| 1.0   | Ma et al. 2004            | 59          | 59               | 59              | 55                | 52           | 59          | 59   | 52               | 52  | 59         | -   | -    | -    | 59   | 59   | -            | -    | 27   |
| 1.0   | Minn et al. 2005          | 82          | 82               | 82              | 76                | 82           | -           | -    | -                | -   | 82         | -   | -    | -    | 82   | 82   | 27           | -    | 27   |
| 1.0   | Pawitan et al. 2005       | 159         | 159 <sup>b</sup> | -               | -                 | -            | -           | 147  | -                | -   | -          | -   | -    | 159  | 159  | 159  | 40           | 40   | 50   |
| 1.0   | Wang et al. 2005          | 286         | 286              | -               | -                 | 286          | -           | -    | -                | -   | -          | -   | -    | -    | 286  | 286  | 107          | -    | 107  |
| 1.0   | Weigelt et al. 2005       | 50          | 50               | -               | -                 | 50           | -           | 50   | 21 <sup>c</sup>  | -   | 50         | -   | -    | -    | 50   | 50   | 13           | 10   | 13   |
| 1.0   | Bild et al. 2006          | 158         | 158 <sup>b</sup> | -               | -                 | -            | -           | -    | -                | -   | -          | -   | -    | -    | 158  | 158  | -            | 50   | 50   |
| 1.0   | Chin et al. 2006          | 112         | 112              | 112             | 78                | 112          | -           | 107  | 46 <sup>c</sup>  | -   | 112        | 80  | -    | -    | 99   | 112  | 21           | 35   | 42   |
| 1.0   | Ivshina et al. 2006       | 249         | 245              | 0               | 0                 | 240          | -           | 249  | 159 <sup>c</sup> | -   | 249        | 247 | -    | 249  | 249  | 249  | 0            | 0    | 89   |
| 1.0   | Desmedt et al. 2007       | 198         | 198              | 0               | 0                 | 198          | 184         | 196  | 196              | 196 | 198        | -   | -    | -    | 198  | 198  | 62           | 56   | 91   |
| 1.0   | Loi et al. 2007           | 267         | 261              | 87              | 0                 | 261          | 0           | 208  | 123 <sup>c</sup> | 0   | 267        | -   | -    | 267  | 266  | 267  | 66           | 0    | 88   |
| 1.0   | Minn et al. 2007          | 58          | 58               | 0               | 0                 | 0            | 0           | 0    | 0                | 0   | 0          | -   | -    | -    | 58   | 58   | 11           | 0    | 11   |
| 1.0   | Naderi et al. 2007        | 135         | 133              | 0               | 0                 | 129          | 0           | 134  | 129              | 128 | 135        | -   | -    | -    | 127  | 135  | 0            | 47   | 65   |
| 1.0   | Anders et al. 2008        | 75          | 71               | 70              | 0                 | 75           | 74          | 64   | 64               | 61  | 75         | -   | -    | -    | 75   | 75   | 14           | 0    | 14   |
| 1.0   | Chanrion et al. 2008      | 151         | 139              | 139             | 0                 | 146          | 139         | 144  | 134              | 124 | 151        | -   | -    | -    | 139  | 151  | 46           | 41   | 55   |
| 1.0   | Loi et al. 2008           | 77          | 77               | 77              | 0                 | 77           | 0           | 58   | 30 <sup>c</sup>  | 0   | 77         | -   | -    | 77   | 77   | 77   | 10           | 0    | 13   |
| 1.0   | Calabrò et al. 2009       | 139         | 136              | 136             | 49                | 103          | 0           | 0    | 0                | 0   | 139        | -   | -    | -    | 116  | 139  | 0            | 63   | 96   |
| 1.0   | Jézéquel et al. 2009      | 252         | 239              | 236             | 203               | 252          | 0           | 252  | 252              | 252 | 252        | -   | -    | -    | 0    | 0    | 65           | 47   | 68   |
| 1.1   | Schmidt et al. 2008       | 200         | 200 <sup>b</sup> | 0               | 0                 | 200          | 0           | 200  | 200              | 0   | 0          | -   | -    | -    | 200  | 200  | 46           | 0    | 46   |
| 1.1   | Zhang et al. 2009         | 136         | 136              | 136             | 0                 | 136          | 0           | 0    | 0                | 0   | 0          | -   | -    | -    | 136  | 136  | 20           | 0    | 20   |
| 3.1   | Chin et al. 2007          | 171         | 170              | 0               | 0                 | 170          | 0           | 170  | 170              | 0   | 171        | -   | -    | -    | 152  | 171  | 38           | 57   | 56   |
| 3.1   | Zhou et al. 2007          | 54          | 54               | 0               | 0                 | 54           | 0           | 0    | 0                | 0   | 54         | -   | -    | -    | 54   | 54   | 9            | 0    | 9    |
| 3.1   | Desmedt et al. 2009       | 55          | 55               | 55              | 45                | 55           | 0           | 55   | 0                | 0   | 55         | -   | -    | 55   | 55   | 55   | 0            | 0    | 55   |
| 3.1   | Jönsson et al. 2010       | 346         | 335              | 332             | 0                 | 0            | 0           | 226  | 0                | 0   | 0          | -   | -    | -    | 346  | 0    | 0            | 151  | 151  |
| 3.1   | Li et al. 2010            | 115         | 115              | 115             | 115               | 115          | 103         | 115  | 64 <sup>c</sup>  | 0   | 115        | -   | -    | 115  | 115  | 115  | 14           | 0    | 14   |
| 3.1   | Sircoulomb et al. 2010    | 55          | 47               | 47              | 37                | 45           | 33          | 47   | 0                | 0   | 49         | 29  | -    | 55   | 55   | 55   | 17           | 0    | 17   |
| 3.1   | Buffa et al. 2011         | 216         | 216              | 0               | 0                 | 216          | 0           | 191  | 191              | 0   | 216        | 0   | -    | 0    | 216  | 216  | 82           | 0    | 82   |
| 3.1   | Dedeurwaerder et al. 2011 | 85          | 84               | 0               | 85                | 85           | 85          | 85   | 29 <sup>c</sup>  | 0   | 85         | 0   | -    | 85   | 85   | 85   | 0            | 0    | 36   |
| 3.1   | Filipits et al. 2011      | 277         | 277              | 0               | 277               | 0            | 0           | 0    | 0                | 0   | 0          | 0   | -    | 0    | 276  | 277  | 58           | 0    | 58   |
| 3.1   | Hatzis et al. 2011        | 309         | 304              | 303             | 309               | 309          | 0           | 286  | 0                | 0   | 309        | 0   | -    | 0    | 309  | 309  | 65           | 0    | 65   |
| 3.1   | Kao et al. 2011           | 296         | 296 <sup>b</sup> | 0               | 0                 | 296          | 0           | 0    | 0                | 0   | 296        | 0   | -    | 296  | 296  | 296  | 63           | 62   | 73   |
| 3.1   | Sabatier et al. 2011      | 239         | 237              | 237             | 224               | 233          | 211         | 233  | 0                | 0   | 238        | 175 | -    | 239  | 239  | 239  | 0            | 0    | 74   |
| 3.1   | Wang et al. 2011          | 149         | 149              | 149             | 149               | 148          | 147         | 149  | 148              | 0   | 149        | 0   | -    | 0    | 149  | 149  | 0            | 0    | 10   |
| 3.1   | Kuo et al. 2012           | 51          | 51               | 51              | 51                | 51           | 51          | 47   | 0                | 0   | 51         | 0   | -    | 0    | 51   | 51   | 12           | 0    | 12   |
| 3.1   | Nagalla et al. 2013       | 41          | 40               | 38              | 39                | 41           | 0           | 39   | 39               | 36  | 41         | 0   | -    | 0    | 41   | 41   | 14           | 10   | 14   |
| 4.3   | expO et al. 2005          | 298         | 210              | 209             | 198               | 257          | 289         | 252  | 39 <sup>c</sup>  | 0   | 298        | 0   | -    | 298  | 298  | 298  | 0            | 0    | 0    |
| 4.3   | Yau et al. 2007           | 47          | 47               | 47              | 0                 | 43           | 0           | 0    | 0                | 0   | 47         | 0   | -    | 0    | 47   | 47   | 0            | 0    | 0    |
| 4.3   | Parris et al. 2010        | 94          | 94               | 94              | 94                | 94           | 80          | 75   | 75               | 0   | 93         | 0   | -    | 0    | 93   | 94   | 0            | 44   | 45   |
| 4.3   | Symmans et al. 2010       | 43          | 43               | 0               | 0                 | 42           | 0           | 0    | 0                | 0   | 0          | 0   | -    | 0    | 43   | 43   | 71           | 0    | 71   |
| 4.3   | Heikkinen et al. 2011     | 174         | 0                | 0               | 0                 | 0            | 0           | 0    | 0                | 0   | 0          | 0   | -    | 0    | 172  | 174  | 34           | 27   | 34   |
| 4.3   | Sabatier et al. 2011      | 71          | 71               | 71              | 19                | 26           | 0           | 0    | 0                | 0   | 44         | 0   | -    | 71   | 71   | 71   | 0            | 0    | 0    |
| 4.3   | Curtis et al. 2012        | 1980        | 1937             | 1980            | 1980              | 1980         | 1830        | 1892 | 1875             | 0   | 1980       | 0   | 1980 | 0    | 1978 | 1980 | 602          | 1143 | 1235 |
| 4.3   | Guedj et al. 2012         | 536         | 515              | 514             | 390               | 438          | 427         | 517  | 0                | 0   | 523        | 239 | 0    | 536  | 536  | 536  | 119          | 0    | 119  |
| 4.3   | Servant et al. 2012       | 343         | 0                | 0               | 0                 | 337          | 318         | 339  | 0                | 0   | 343        | 97  | 0    | 0    | 343  | 343  | 119          | 0    | 119  |
| 4.3   | Clarke et al. 2013        | 104         | 101              | 0               | 0                 | 104          | 0           | 104  | 45 <sup>c</sup>  | 0   | 104        | 0   | 0    | 104  | 104  | 104  | 48           | 35   | 48   |
| 4.3   | Larsen et al. 2013        | 183         | 183              | 183             | 183               | 0            | 169         | 157  | 0                | 0   | 183        | 0   | 0    | 0    | 182  | 183  | 0            | 0    | 0    |
| 4.3   | Castagnoli et al. 2014    | 53          | 53               | 53              | 53                | 53           | 0           | 53   | 0                | 0   | 53         | 0   | 0    | 0    | 53   | 53   | 23           | 0    | 23   |
| 4.3   | Fumagalli et al. 2014     | 56          | 56               | 56              | 56                | 54           | 52          | 56   | 54               | 0   | 55         | 0   | 0    | 56   | 56   | 56   | 0            | 0    | 0    |
| 4.3   | Merdad et al. 2014        | 45          | 38               | 38              | 38                | 0            | 40          | 38   | 0                | 0   | 45         | 0   | 0    | 0    | 45   | 45   | 0            | 0    | 0    |
| 4.3   | Terunuma et al. 2014      | 55          | 55               | 12              | 12                | 55           | 0           | 48   | 244 <sup>c</sup> | 0   | 55         | 55  | 0    | 0    | 55   | 55   | 0            | 19   | 19   |
| 4.3   | Burstein et al. 2015      | 66          | 66               | 66              | 49                | 0            | 64          | 47   | 0                | 0   | 63         | 0   | 0    | 66   | 66   | 66   | 0            | 0    | 0    |
| 4.3   | Michaut et al. 2016       | 104         | 88               | 92              | 89                | 104          | 95          | 96   | 83               | 0   | 103        | 0   | 0    | 0    | 104  | 104  | 26           | 20   | 32   |
| 4.3   | Biermann et al. 2017      | 53          | 52               | 52              | 53                | 42           | 0           | 0    | 0                | 0   | 53         | 0   | 0    | 0    | 53   | 53   | 0            | 0    | 0    |
| 4.5   | Bos et al. 2009           | 204         | 56               | 56              | 56                | 0            | 0           | 0    | 0                | 0   | 0          | 0   | 0    | 0    | 0    | 0    | 0            | 0    | 0    |
| 4.5   | Silver et al. 2010        | 75          | 35               | 35              | 35                | 0            | 0           | 0    | 0                | 0   | 0          | 0   | 0    | 0    | 0    | 0    | 0            | 0    | 0    |
| 4.5   | Burstein et al. 2015      | 198         | 198              | 198             | 198               | 0            | 0           | 0    | 0                | 0   | 0          | 0   | 0    | 0    | 0    | 0    | 0            | 0    | 0    |
| 4.5   | Jézéquel et al. 2015      | 107         | 107              | 107             | 107               | 0            | 0           | 0    | 0                | 0   | 0          | 0   | 0    | 0    | 0    | 0    | 0            | 0    | 0    |
| 4.5   | Jézéquel et al. 2019      | 131         | 131              | 131             | 131               | 0            | 0           | 0    | 0                | 0   | 0          | 0   | 0    | 0    | 0    | 0    | 0            | 0    | 0    |
| Total |                           | 10716       | 9759             | 6496            | 5533              | 8240         | 4549        | 7325 | 4381             | 948 | 7857       | 922 | 1980 | 2728 | 9657 | 9403 | 2093         | 2081 | 3618 |

<sup>a</sup> ER Oestrogen receptor, progesterone receptor (PR) and HER2 status determined by immunohistochemistry (IHC)

<sup>b</sup> ER status determined by means of genomics data (Affymetrix® probe: 205225\_at) in case of a lack of IHC data

<sup>c</sup> NPI score could be computed only for node negative patients

Ver: version number of bc-GenExMiner; No: number of; Histo. Type: histological type; SBR: Scarff-Bloom and Richardson grade; NPI: Nottingham Prognostic Index; AOL: Adjuvant! Online; Age diagn.: age at diagnosis; IHC: immunohistochemistry; Seq: sequence-based; GES: gene expression signature; SSPs: single sample predictors; SCMs: subtype clustering models; DMFS: distant metastasis-free survival (first pejorative event represented by distant relapse); OS: overall survival (first pejorative event represented by death); DFS: disease-free survival (first pejorative event represented by any relapse or death); -: no data

## B

| Ver             | Reference            | No patients | ER <sup>a</sup> | PR <sup>a</sup> | HER2 <sup>a</sup> | Nodal status | Histo. type | SBR  | NPI  | AOL | Age diagn. | P53 |      |     | SSPs | SCMs | Event status |     |     |
|-----------------|----------------------|-------------|-----------------|-----------------|-------------------|--------------|-------------|------|------|-----|------------|-----|------|-----|------|------|--------------|-----|-----|
|                 |                      |             |                 |                 |                   |              |             |      |      |     |            | IHC | seq  | GES |      |      | DMFS         | OS  | DFS |
| Healthy         |                      |             |                 |                 |                   |              |             |      |      |     |            |     |      |     |      |      |              |     |     |
| 4.5             | GTEX et al. 2019     | 92          | -               | -               | -                 | -            | -           | -    | -    | -   | -          | -   | -    | -   | -    | -    | -            | -   |     |
| Tumour-adjacent |                      |             |                 |                 |                   |              |             |      |      |     |            |     |      |     |      |      |              |     |     |
| 4.5             | TCGA et al. 2012     | 104         | -               | -               | -                 | -            | -           | -    | -    | -   | -          | -   | -    | -   | -    | -    | -            | -   |     |
| Tumour          |                      |             |                 |                 |                   |              |             |      |      |     |            |     |      |     |      |      |              |     |     |
| 4.3             | TCGA et al. 2012     | 1034        | 988             | 985             | 689               | 881          | 989         | -    | -    | -   | 1033       | -   | 1031 | -   | 1034 | 1034 | -            | 99  | 99  |
| 4.3             | Brueffer et al. 2018 | 405         | 405             | 405             | 405               | -            | -           | 405  | -    | -   | -          | -   | -    | -   | 405  | 405  | -            | -   | -   |
| 4.3             | Saal et al. 2018     | 3273        | 3073            | 2940            | 3151              | 3180         | -           | 3212 | 3114 | -   | 3273       | -   | -    | -   | 3270 | 3273 | -            | 336 | 336 |
|                 | Total                | 4712        | 4466            | 4330            | 4245              | 4061         | 989         | 3617 | 3114 | -   | 4306       | -   | 2062 | -   | 4709 | 4712 | -            | 435 | 435 |

<sup>a</sup> ER Oestrogen receptor, progesterone receptor (PR) and HER2 status determined by immunohistochemistry (IHC)

Ver: version number of bc-GenExMiner; No: number of; Histo. Type: histological type; SBR: Scarff-Bloom and Richardson grade; NPI: Nottingham Prognostic Index; AOL: Adjuvant! Online; Age diagn.: age at diagnosis; IHC: immunohistochemistry; Seq: sequence-based; GES: gene expression signature; SSPs: single sample predictors; SCMs: subtype clustering models; DMFS: distant metastasis-free survival (first pejorative event represented by distant relapse); OS: overall survival (first pejorative event represented by death); DFS: disease-free survival (first pejorative event represented by any relapse or death); -: no data

**Supplementary Table S3.** Continuous score gene-expression signatures analyses results in function of three types of breast tissues

| GES name                                      | <i>p</i> value | <i>p</i> value |          |          | Results    |
|-----------------------------------------------|----------------|----------------|----------|----------|------------|
|                                               |                | H vs TA        | H vs T   | TA vs T  |            |
| <b>Metabolism</b>                             |                |                |          |          |            |
| Glycolysis                                    | < 0.0001       | 0.8133         | < 0.0001 | < 0.0001 | H = TA < T |
| IRGS                                          | < 0.0001       | 0.3907         | < 0.0001 | < 0.0001 | H = TA < T |
| <b>Critical biological pathways in cancer</b> |                |                |          |          |            |
| CIN                                           | < 0.0001       | 0.0004         | < 0.0001 | < 0.0001 | H < TA < T |
| E2F3                                          | < 0.0001       | 0.0123         | < 0.0001 | 0.2855   | H < TA = T |
| MYC                                           | < 0.0001       | < 0.0001       | < 0.0001 | < 0.0001 | H < TA < T |
| PNI                                           | < 0.0001       | 0.0534         | < 0.0001 | < 0.0001 | H = TA < T |
| Proliferation                                 | < 0.0001       | 0.0001         | < 0.0001 | < 0.0001 | H < TA < T |
| TGFβ                                          | < 0.0001       | < 0.0001       | < 0.0001 | 0.0254   | H > TA > T |
| Wound-response                                | < 0.0001       | < 0.0001       | < 0.0001 | < 0.0001 | H < TA < T |
| <b>Prognosis</b>                              |                |                |          |          |            |
| 38-GES                                        | < 0.0001       | 0.7814         | < 0.0001 | < 0.0001 | H = TA < T |
| 70-GES                                        | < 0.0001       | 0.5975         | < 0.0001 | < 0.0001 | H = TA < T |
| GGI                                           | < 0.0001       | 0.0219         | < 0.0001 | < 0.0001 | H < TA < T |

GES: gene expression signature; H: breast healthy tissue; TA: breast tumour-adjacent tissue; T: breast tumour tissue; IRGS: iron regulatory gene signature; CIN: chromosomal instability; E2F3: E2F3 transcription factor 3; MYC: MYC proto-oncogene BHLH transcription factor; PNI: perineural invasion; TGFβ: transforming growth factor beta, GGI genomic grade index

**Supplementary Table S4.** Comparisons of gene expressions of genes included in p53 gene expression signature in function of p53 status (wild type or mutated) determined by immunohistochemistry or sequencing. Analyses are carried out using microarray and RNAseq data

| Affymetrix<br>probe set ID | Gene            | GES gene<br>weight | Microarrays       |                       | RNAseq            |  |
|----------------------------|-----------------|--------------------|-------------------|-----------------------|-------------------|--|
|                            |                 |                    | Affymetrix<br>IHC | METABRIC<br>Seq-based | TCGA<br>Seq-based |  |
| 217889_s_at                | <i>CYBRD1</i>   | 1                  | >                 | >                     | >                 |  |
| 243929_at                  | No gene         | 1                  | >                 | NA                    | NA                |  |
| 229975_at                  | <i>BMPR1B</i>   | 1                  | >                 | >                     | >                 |  |
| 223864_at                  | <i>ANKRD30A</i> | 1                  | >                 | >                     | >                 |  |
| 227081_at                  | <i>DNALI1</i>   | 1                  | >                 | >                     | >                 |  |
| 215014_at                  | <i>KCND3</i>    | 1                  | >                 | =                     | >                 |  |
| 206869_at                  | <i>CHAD</i>     | 1                  | >                 | >                     | >                 |  |
| 221585_at                  | <i>CACNG4</i>   | 1                  | >                 | >                     | >                 |  |
| 205440_s_at                | <i>NPY1R</i>    | 1                  | >                 | >                     | >                 |  |
| 228969_at                  | <i>AGR2</i>     | 1                  | >                 | >                     | >                 |  |
| 212949_at                  | <i>NCAPH</i>    | -1                 | <                 | =                     | <                 |  |
| 226067_at                  | <i>BPIFB1</i>   | 1                  | >                 | >                     | >                 |  |
| 232855_at                  | No gene         | 1                  | >                 | NA                    | NA                |  |
| 221520_s_at                | <i>CDCA8</i>    | -1                 | <                 | <                     | <                 |  |
| 205472_s_at                | <i>DACH1</i>    | 1                  | >                 | >                     | >                 |  |
| 205186_at                  | <i>DNALI1</i>   | 1                  | >                 | >                     | >                 |  |
| 221275_s_at                | No gene         | 1                  | >                 | NA                    | NA                |  |
| 229030_at                  | <i>CAPN8</i>    | 1                  | >                 | >                     | >                 |  |
| 233413_at                  | No gene         | 1                  | >                 | NA                    | NA                |  |
| 203438_at                  | <i>STC2</i>     | 1                  | >                 | >                     | >                 |  |
| 230378_at                  | <i>SCGB3A1</i>  | 1                  | >                 | >                     | >                 |  |
| 238581_at                  | <i>GBP5</i>     | -1                 | <                 | <                     | <                 |  |
| 235343_at                  | <i>VASH2</i>    | -1                 | <                 | <                     | <                 |  |
| 229150_at                  | No gene         | 1                  | >                 | NA                    | NA                |  |
| 205734_s_at                | <i>AFF3</i>     | 1                  | >                 | >                     | >                 |  |
| 214079_at                  | <i>DHRS2</i>    | 1                  | >                 | >                     | >                 |  |
| 238746_at                  | <i>PXMP4</i>    | 1                  | >                 | >                     | >                 |  |
| 204623_at                  | <i>TFF3</i>     | 1                  | >                 | >                     | >                 |  |
| 230863_at                  | <i>LRP2</i>     | 1                  | >                 | >                     | >                 |  |
| 215047_at                  | <i>TRIM58</i>   | 1                  | >                 | NA                    | NA                |  |
| 201710_at                  | <i>MYBL2</i>    | -1                 | <                 | =                     | <                 |  |

GES: gene expression signature; IHC: immunohistochemistry; Seq-based: sequence-based; <: p53 wild type < p53 mutated (p < 0.05); >: p53 wild type > p53 mutated (p < 0.05); =: p53 wild type = p53 mutated (p ≥ 0.05); NA: no analysis

**Supplementary Table S5.** Comparisons of gene expressions of genes included in proliferation gene expression signature in function of p53 status (wild type or mutated) determined by immunohistochemistry or sequencing. Analyses are carried out using microarray and RNAseq data

| Affymetrix<br>probe set ID | Gene          | GES gene<br>weight | Microarrays |     | RNAseq    |           |
|----------------------------|---------------|--------------------|-------------|-----|-----------|-----------|
|                            |               |                    | Affymetrix  |     | METABRIC  | TCGA      |
|                            |               |                    | IHC         | GES | Seq-based | Seq-based |
| 206102_at                  | <i>GINS1</i>  | 1                  | <           | <   | =         | <         |
| 209172_s_at                | <i>CENPF</i>  | 1                  | <           | <   | <         | <         |
| 203418_at                  | <i>CCNA2</i>  | 1                  | <           | <   | <         | <         |
| 204026_s_at                | <i>ZWINT</i>  | 1                  | <           | <   | <         | <         |
| 203213_at                  | <i>CDK1</i>   | 1                  | <           | <   | <         | <         |
| 203214_x_at                | <i>CDK1</i>   | 1                  | <           | <   | <         | <         |
| 210559_s_at                | <i>CDK1</i>   | 1                  | <           | <   | <         | <         |
| 204170_s_at                | <i>CKS2</i>   | 1                  | <           | <   | <         | <         |
| 204092_s_at                | <i>AURKA</i>  | 1                  | <           | <   | <         | <         |
| 208079_s_at                | <i>AURKA</i>  | 1                  | <           | <   | <         | <         |
| 204092_s_at                | <i>AURKA</i>  | 1                  | <           | <   | <         | <         |
| 213226_at                  | <i>CCNA2</i>  | 1                  | <           | <   | <         | <         |
| 202095_s_at                | <i>BIRC5</i>  | 1                  | <           | <   | <         | <         |
| 202613_at                  | <i>CTPS1</i>  | 1                  | <           | <   | <         | <         |
| 201291_s_at                | <i>TOP2A</i>  | 1                  | <           | <   | <         | <         |
| 201292_at                  | <i>TOP2A</i>  | 1                  | <           | <   | <         | <         |
| 222039_at                  | <i>KIF18B</i> | 1                  | <           | <   | <         | <         |
| 204822_at                  | <i>TTK</i>    | 1                  | <           | <   | <         | <         |
| 202954_at                  | <i>UBE2C</i>  | 1                  | <           | <   | <         | <         |
| 203755_at                  | <i>BUB1B</i>  | 1                  | <           | <   | NA        | <         |
| 202705_at                  | <i>CCNB2</i>  | 1                  | <           | <   | <         | <         |
| 204962_s_at                | <i>CENPA</i>  | 1                  | <           | <   | <         | <         |
| 209642_at                  | <i>BUB1</i>   | 1                  | <           | <   | <         | <         |
| 202870_s_at                | <i>CDC20</i>  | 1                  | <           | <   | <         | <         |
| 209408_at                  | <i>KIF2C</i>  | 1                  | <           | <   | <         | <         |
| 221520_s_at                | <i>CDCA8</i>  | 1                  | <           | <   | <         | <         |
| 218039_at                  | <i>NUSAP1</i> | 1                  | <           | <   | <         | <         |
| 206364_at                  | <i>KIF14</i>  | 1                  | <           | <   | <         | <         |
| 204641_at                  | <i>NEK2</i>   | 1                  | <           | <   | <         | <         |
| 207828_s_at                | <i>CENPF</i>  | 1                  | <           | <   | <         | <         |
| 219918_s_at                | <i>ASPM</i>   | 1                  | <           | <   | <         | <         |
| 204444_at                  | <i>KIF11</i>  | 1                  | <           | <   | <         | <         |
| 218542_at                  | <i>CEP55</i>  | 1                  | <           | <   | <         | <         |
| 213008_at                  | <i>FANCI</i>  | 1                  | <           | <   | <         | <         |
| 213007_at                  | <i>FANCI</i>  | 1                  | <           | <   | <         | <         |
| 218009_s_at                | <i>PRC1</i>   | 1                  | <           | <   | <         | <         |
| 210052_s_at                | <i>TPX2</i>   | 1                  | <           | <   | <         | <         |
| 203764_at                  | <i>DLGAP5</i> | 1                  | <           | <   | <         | <         |
| 214710_s_at                | <i>CCNB1</i>  | 1                  | <           | <   | <         | <         |
| 218355_at                  | <i>KIF4A</i>  | 1                  | <           | <   | <         | <         |
| 202580_x_at                | <i>FOXM1</i>  | 1                  | <           | <   | <         | <         |
| 221436_s_at                | <i>CDCA3</i>  | 1                  | <           | <   | <         | <         |
| 218755_at                  | <i>KIF20A</i> | 1                  | <           | <   | <         | <         |
| 218663_at                  | <i>NCAPG</i>  | 1                  | <           | <   | <         | <         |
| 219148_at                  | <i>PBK</i>    | 1                  | <           | <   | <         | <         |
| 218585_s_at                | <i>DTL</i>    | 1                  | <           | <   | <         | <         |
| 218726_at                  | <i>HJURP</i>  | 1                  | <           | <   | <         | <         |

GES: gene expression signature; IHC: immunohistochemistry; Seq-based: sequence-based; <: p53 wild type < p53 mutated (p < 0.05); =: p53 wild type = p53 mutated (p ≥ 0.05); NA: no analysis

**Supplementary Table S6.** Comparisons of representative immune response gene expressions in function of p53 status (wild type or mutated) determined by immunohistochemistry, gene expression signature or sequencing. Analyses are carried out using microarray and RNAseq data

| Gene                | Microarrays |     | RNAseq    |           |
|---------------------|-------------|-----|-----------|-----------|
|                     | All         |     | METABRIC  | TCGA      |
|                     | IHC         | GES | Seq-based | Seq-based |
| <i>CD8A</i>         |             | <   | <         | <         |
| <i>GZMA</i>         |             | <   | <         | <         |
| <i>GZMB</i>         |             | <   | <         | <         |
| <i>IGHM</i>         |             | <   | NA        | <         |
| <i>IGKC</i>         |             | <   | <         | <         |
| <i>MS4A1 (CD20)</i> |             | <   | <         | <         |
| <i>PRF1</i>         |             | <   | <         | <         |
| <i>STAT1</i>        |             | <   | <         | <         |

IHC: immunohistochemistry; GES: gene expression signature; Seq-based: sequence-based; <: p53 wild type < p53 mutated (p < 0.05); NA: no analysis



**Supplementary Table S7.** Comparisons of HLA gene expressions in function of p53 status (wild type or mutated) determined by immunohistochemistry, gene expression signature or sequencing. Analyses are carried out using microarray and RNAseq data

| Gene            | Microarrays |     | RNAseq                |                   |
|-----------------|-------------|-----|-----------------------|-------------------|
|                 | All<br>IHC  | GES | METABRIC<br>Seq-based | TCGA<br>Seq-based |
| <i>HLA-DRA</i>  | =           | <   | <                     | <                 |
| <i>HLA-DMA</i>  | <           | <   | <                     | <                 |
| <i>HLA-DRB6</i> | =           | <   | NA                    | <                 |
| <i>HLA-DQA1</i> | =           | <   | <                     | <                 |
| <i>HLA-E</i>    | <           | <   | <                     | <                 |
| <i>HLA-DPB1</i> | =           | <   | <                     | =                 |
| <i>HLA-DPA1</i> | =           | <   | <                     | =                 |
| <i>HLA-H</i>    | NA          | NA  | <                     | <                 |
| <i>HLA-G</i>    | <           | <   | <                     | <                 |
| <i>HLA-DOA</i>  | =           | <   | <                     | =                 |
| <i>HLA-DOB</i>  | <           | <   | <                     | <                 |
| <i>HLA-DQA2</i> | =           | NA  | <                     | =                 |
| <i>HLA-DMB</i>  | <           | <   | <                     | <                 |
| <i>HLA-A</i>    | <           | <   | <                     | <                 |
| <i>HLA-F</i>    | <           | <   | <                     | <                 |
| <i>HLA-B</i>    | <           | <   | <                     | <                 |
| <i>HLA-DRB1</i> | <           | <   | =                     | <                 |
| <i>HLA-DQB1</i> | <           | <   | =                     | <                 |
| <i>HLA-C</i>    | <           | <   | <                     | <                 |
| <i>HLA-DRB4</i> | =           | <   | <                     | NA                |

IHC: immunohistochemistry; GES: gene expression signature; Seq-based: sequence-based ; <: p53 wild type < p 53 mutated (p < 0.05); =: p53 wild type = p53 mutated (p ≥ 0.05); NA: no analysis

**Supplementary Table S8.** Comparisons of immune checkpoint gene expressions in function of p53 status (wild type or mutated) determined by immunohistochemistry, gene expression signature or sequencing. Analyses are carried out using microarray and RNAseq data

| Gene                    | Microarrays |     | RNAseq                |                   |
|-------------------------|-------------|-----|-----------------------|-------------------|
|                         | All<br>IHC  | GES | METABRIC<br>Seq-based | TCGA<br>Seq-based |
| <i>BTLA</i>             |             | <   | <                     | <                 |
| <i>CD27</i>             |             | <   | <                     | <                 |
| <i>CD80</i>             |             | <   | <                     | <                 |
| <i>CD86</i>             |             | <   | <                     | <                 |
| <i>CD274 (PD-L1)</i>    |             | <   | <                     | <                 |
| <i>CTLA4</i>            |             | <   | <                     | <                 |
| <i>IDO1</i>             |             | <   | <                     | <                 |
| <i>IDO2</i>             |             | <   | <                     | <                 |
| <i>LAG3</i>             |             | <   | <                     | <                 |
| <i>PDCD1 (PD1)</i>      |             | <   | <                     | <                 |
| <i>PDCD1LG2 (PD-L2)</i> |             | <   | <                     | <                 |
| <i>TIGIT</i>            |             | <   | <                     | <                 |

IHC: immunohistochemistry; GES: gene-expression signature; Seq-based: sequence-based; <: p53 wild type < p53 mutated (p < 0.05)

**Supplementary Table S9.** TNBC cohorts used for gene expression analysis in TNBC subtypes

| Study code | DNA chip          | TNBC patients | Reference |
|------------|-------------------|---------------|-----------|
| E-MTAB-365 | Affymetrix U133P2 | 51            | (S1)      |
| GSE12276   | Affymetrix U133P2 | 56            | (S2)      |
| GSE18864   | Affymetrix U133P2 | 35            | (S3)      |
| GSE19615   | Affymetrix U133P2 | 28            | (S4)      |
| GSE21653   | Affymetrix U133P2 | 87            | (S5)      |
| GSE58812   | Affymetrix U133P2 | 107           | (S6)      |
| GSE76124   | Affymetrix U133P2 | 198           | (S7)      |
| GSE83937   | Affymetrix U133P2 | 131           | (S8)      |

## References

- S1. Guedj,M., Marisa,L., de Reynies,A., *et al.* (2011) A refined molecular taxonomy of breast cancer. *Oncogene*, **31**, 1196-1206.
- S2. Bos,P.D., Zhang,X.H., Nadal,C., *et al.* (2009) Genes that mediate breast cancer metastasis to the brain. *Nature*, **459**, 1005-1009.
- S3. Silver,D.P., Richardson,A.L., Eklund,A.C., *et al.* (2010) Efficacy of neoadjuvant Cisplatin in triple-negative breast cancer. *J. Clin. Oncol.*, **28**, 1145-1153.
- S4. Li,Y., Zou,L., Li,Q., *et al.* (2010) Amplification of LPTM4B and YWHAZ contributes to chemotherapy resistance and recurrence of breast cancer. *Nat. Med.*, **16**, 214-218.
- S5. Sabatier,R., Finetti,P., Cervera,N., *et al.* (2011) A gene expression signature identifies two prognostic subgroups of basal breast cancer. *Breast Cancer Res. Treat.*, **126**, 407-420.
- S6. Jézéquel,P., Loussouarn,D., Guérin-Charbonnel,C., *et al.* (2015) Gene-expression molecular subtyping of triple-negative breast cancer tumours: importance of immune response. *Breast Cancer Res.*, **17**, 43.
- S7. Burstein,M.D., Tsimelzon,A., Poage,G.M., *et al.* (2015) Comprehensive genomic analysis identifies novel subtypes and targets of triple-negative breast cancer. *Clin. Cancer Res.*, **21**, 1688-1698.
- S8. Jézéquel,P., Kerdran,O., Hondermarck,H., *et al.* (2019) Identification of three subtypes of triple-negative breast cancer with potential therapeutic implications. *Breast Cancer Res.*, **21**, 65.
